# Supplementary material for: TFAP2C-Mediated lncRNA PCAT1 Inhibits Ferroptosis in Docetaxel-Resistant Prostate Cancer Through c-Myc/miR-25-3p/SLC7A11 Signaling
Source: Front Oncol. 2022 Mar 23;12:862015. doi: 10.3389/fonc.2022.862015 (PMC8985761; doi:10.3389/fonc.2022.862015)
Supplement: Supplementary Table S1 — The sequences of primers, oligonucleotides and probes used in this study. [file Table_1.xlsx]

## Sheet: Sheet1
ChIP-qPCR Primer sequences
c-Myc-Site A	Forward	gtgcgtataaaggtagcttcag
	Revese	ctaactttctcaaccaagtgtc
c-Myc-Site B	Forward	aggtcagttgagcaacaagctc
	Revese	cctgcctgtcacaccaacttac
TFAP2C-Site 1	Forward	TAAACTAGGACACACTGGT
	Revese	CTCCCTCATGGAAAACACT
TFAP2C-Site 2	Forward	GCTCCTTCCCCTCCTCTTC
	Revese	AAACCCCATTGCTACTAAA
TFAP2C-Site 3	Forward	AGTTGGGCTTTGCTTGTTG
	Revese	TGCTGAAGTGCTTTTGAAT
siRNA sequences
siPCAT1 #1	AUACAUAAGACCAUGGAAAUTT
siPCAT1 #2	GAACCUAACUGGACUUUAATT
si-cMyc #1	GAGGAUAUCUGGAAGAAAUTT
si-cMyc #2	GGAAGAAAUCGAUGUUGUUTT
siTFAP2C #1	CCAGCAACUGUGUAAAGAATT
siTFAP2C #2	UUACCUACCCUUACCUAUUTT
si-CBX4	GGAUGAACCCAUAGACUUGTT
si-DDX5	GCAAGUAGCUGCUGAAUAUUU
siSLC7A11 #1	CCAGAUAUGCAUCGUCCUUTT
siSLC7A11 #2	CCUCUAUUCGGACCCAUUUTT
siSLC7A11 #3	CCAGGUGGUUUAGAAUAAUTT
qRT-PCR Primer sequences
PCAT1	Forward	TGAGAAGAGAAATCTATTGGAACC
	Reverse	GGTTTGTCTCCGCTGCTTTA
TFAP2C	Forward	TCAGTCCCTGGAAGATTGTCG
	Reverse	CCAGTAACGAGGCATTTAAGCA
SLC7A11	Forward	GGTCCATTACCAGCTTTTGTACG
	Reverse	AATGTAGCGTCCAAATGCCAG
c-Myc	Forward	AGCTGCTTAGACGCTGGATTTT
	Reverse	TCGAGGTCATAGTTCCTGTTGG
β-actin	Forward	TCCATCATGAAGTGTGACGT
	Reverse	GAGCAATGATCTTGATCTTCAT
